# Supplementary material for: ZIF-derived Co 3 O 4 /Fe 2 O 3 dual-layer hollow nanoboxes as bimetallic nanozymes for detection of hydrogen peroxide and ascorbic acid
Source: Royal Society of Chemistry journal article supplement (doi:10.1039/d5nj03834k), 2025-11-25
Supplement: d5nj03834k1.pdf [file d5nj03834k1.pdf]

## Supporting information

### **ZIF-derived $\text{Co}_3\text{O}_4/\text{Fe}_2\text{O}_3$ Dual-layer Hollow Nanoboxes as Bimetallic Nanozymes for Detection of Hydrogen Peroxide and Ascorbic Acid**

Rongguan Lv<sup>a</sup>, Mengting Shao<sup>b</sup>, Yuan Xiao<sup>b</sup>, Shufei Liu<sup>b</sup>, Yongjun He<sup>b,c</sup>, Jingjing Jiang<sup>b\*</sup>, Haiyan Yu<sup>a</sup>, Fang Guo<sup>d\*</sup>, Ming Chen<sup>b,e\*</sup>, Guowang Diao<sup>b,e</sup>

*a School of Chemistry and Environmental Engineering, Yancheng Teachers University, Yancheng 224000, P. R. China*

*b School of Chemistry and Materials, Yangzhou University, Yangzhou 225002, Jiangsu, P. R. China*

*c Jiangsu Jinshiyuan Latex Products Co., Ltd.*

*d School of Chemistry and Chemical Engineering, Yancheng Institute of Technology, Yancheng 224051, Jiangsu, P. R. China*

*e Jiangsu Provincial Key Laboratory of Green & Functional Materials and Environmental Chemistry*

---

# These authors contributed equally to this work

\*Corresponding Authors E-mail address: [jjj@yzu.edu.cn](mailto:jjj@yzu.edu.cn) (J. Jiang); [gfcyt@163.com](mailto:gfcyt@163.com) (F. Guo); [chenming@yzu.edu.cn](mailto:chenming@yzu.edu.cn) (M. Chen).

## 1 Chemicals and materials

Cobalt nitrate hexahydrate ( $\text{Co}(\text{NO}_3)_2 \cdot 6\text{H}_2\text{O}$ ),  $\text{K}_3[\text{Fe}(\text{CN})_6]$ , cetyltrimethylammonium bromide (CTAB), 2-methylimidazole (2-MIM), and ascorbic acid (AA) were purchased from Shanghai Chemical Corp. Glacial acetic acid ( $\text{CH}_3\text{COOH}$ ), 3,3',5,5'-tetramethylbenzidine (TMB), isopropanol (IPA), L-histidine (L-His), p-benzoquinone (p-BQ), terephthalic acid (PTA) and sodium acetate (NaAc) were purchased from Aladdin Biological Technology Co., Ltd. (Shanghai, China). Hydrogen peroxide ( $\text{H}_2\text{O}_2$ , 30%) were obtained from Sinopharm Chemical Reagent Co., Ltd. (Shanghai, China). The vitamin C injection (0.5 g/5 mL) was purchased from Shanxi Nuocheng Pharmaceutical Co., Ltd (Shanxi, China). All of the experiments were conducted with ultrapure water.

## 2 Apparatus

Morphology was characterized using a Supra 55 SEM set at 5.0 kV, energy-dispersive X-ray spectroscopy (EDX, GENESIS, EDAX, USA), Transmission Electron Microscopy (TEM) at 200 kV, and High-resolution TEM. X-ray diffraction (XRD) data was collected using a graphite monochromator and Cu K radiation ( $\lambda = 0.1541 \text{ nm}$ ) on a D8 advance superspeed powder diffractometer (Bruker). Surface chemical species were identified using X-ray photoelectron spectroscopy (XPS) with the Thermo Escalab 250 instrument. The specific surface area was determined using the Brunauer-Emmett-Teller (BET) method (Autosorb-IQ surface area analyzer). Electron paramagnetic resonance (EPR) spectra were measured using an A300-10/12

(Bruker BioSpin GmbH).

### **3 Synthesis of Co-Fe PBA single-layer hollow nanoboxes (SLHNBs)**

ZIF-67 NCs were dispersed in ethanol, and the solution was heated to 60 °C.  $K_3[Fe(CN)_6]$  and 0.1 mL of aqueous acetic acid (0.1 M) were combined in water to create a clear solution. This mixed aqueous solution was then rapidly injected into the heated ZIF-67 NCs dispersion, with continuous stirring for 1 hour. The resulting product was collected by centrifugation and washed three times with both water and ethanol.

### **4 Synthesis of $Co_3O_4/Fe_2O_3$ single-layer hollow nanoboxes (SLHNBs) and $Co_3O_4$ (SLHNBs)**

Co-Fe PBA SLHNBs and ZIF-67 NCs were heat-treated at 350 °C in air for 2h to obtain  $Co_3O_4/Fe_2O_3$  single-layer hollow nanoboxes (SLHNBs) and  $Co_3O_4$  (SLHNBs), respectively.

### **5 POD-like (peroxidase like) of $Co_3O_4/Fe_2O_3$ DLHNBs and its kinetic tests**

The POD-like activities of  $Co_3O_4/Fe_2O_3$  DLHNBs nanozymes were assessed through the oxidation of 3,3',5,5'-tetramethylbenzidine (TMB) to ox-TMB, facilitated by the nanoboxes in the presence of  $H_2O_2$ , resulting in a colorimetric reaction. The reaction was carried out in 1.86 mL of 0.1 M HAc-NaAc buffer (pH=4), with the addition of 20  $\mu$ L of 0.5 mM TMB and 20  $\mu$ L of 1 mM  $H_2O_2$ . Subsequently, 100  $\mu$ L of a 1 mg/mL catalyst dispersion was introduced and mixed for 3 minutes. The UV-Vis absorption spectrum was then recorded at 652 nm. Optimal pH and temperature conditions for the catalytic oxidation of TMB by  $Co_3O_4/Fe_2O_3$  DLHNBs were

thoroughly investigated by comparing the UV absorption intensity of the catalysts at 652 nm.

The steady-state kinetic parameters,  $K_m$  and  $V_{max}$ , were determined by varying the concentration of TMB while maintaining a constant concentration of  $H_2O_2$  (1 mM), or by varying the  $H_2O_2$  concentration while keeping the TMB concentration constant at 0.5 mM. The change in absorbance at 652 nm over time was recorded to monitor the color change of the reaction in time scan mode.

The Lambert-Beer law is utilized to figure out the initial rate of reaction by Eq. (1):

$$V = k/\epsilon b \quad (1)$$

$$(k = \Delta A/\Delta t, \epsilon = 39,000 \text{ M}^{-1} \text{ cm}^{-1}, \text{ and } b = 1 \text{ cm})^{[1]}$$

By plotting the calculated initial rate versus substrate concentration, a Michaelis–Menten curve Eq. (2):

$$V = V_{max} [S]/(K_m + [S])^{[2]} \quad (2)$$

( $V_{max}$  = the maximum reaction velocity,  $[S]$  = the substrate concentration,  $K_m$  = the Michaelis constant)

## 6 Exploration of the catalytic reaction mechanism

Isopropanol (IPA), L-histidine (L-His), and p-benzoquinone (p-BQ) were employed to explore the catalytic mechanism of  $Co_3O_4/Fe_2O_3$  DLHNBs displaying peroxidase-like activity. This investigation involved the trapping of hydroxyl radicals ( $\bullet OH$ ), singlet oxygen radicals ( $^1O_2$ ), and superoxide radicals ( $O_2^{\bullet -}$ ). Terephthalic acid (PTA) was used as a fluorescent probe within the  $Co_3O_4/Fe_2O_3$  DLHNBs system to

assess the presence of  $\bullet\text{OH}$ . Fluorescence intensity was recorded for different catalysts concentrations using a fluorescence spectrophotometer F-7000 2014XHTM158. Furthermore, electron spin resonance (ESR) spectroscopy was performed to verify the production of  $\bullet\text{OH}$ .

## **7 Detection of $\text{H}_2\text{O}_2$ and ascorbic acid based on nanozymes catalysis**

A total of 100  $\mu\text{L}$  of 0.05 mg/mL  $\text{Co}_3\text{O}_4/\text{Fe}_2\text{O}_3$  DLHNBs and 20  $\mu\text{L}$  of 0.5 mM TMB were added to 1.86 mL of acetate buffer (pH 4.0) and mixed thoroughly. Different concentrations of  $\text{H}_2\text{O}_2$  (ranging from 0 to 1 mM) were then introduced, and the reaction was conducted for 3 minutes at 37  $^\circ\text{C}$  in a constant-temperature water bath. The absorbance at the maximum wavelength was measured to establish the linear relationship between  $\text{H}_2\text{O}_2$  concentration and absorbance.

A mixture was prepared by combining 1.84 mL of acetate buffer (pH 4.0), 100  $\mu\text{L}$  of 0.05 mg/mL  $\text{Co}_3\text{O}_4/\text{Fe}_2\text{O}_3$  DLHNBs, 20  $\mu\text{L}$  of 0.5 mM TMB, and 20  $\mu\text{L}$  of 1 mM  $\text{H}_2\text{O}_2$ . Subsequently, 20  $\mu\text{L}$  of ascorbic acid at varying concentrations (0-40  $\mu\text{M}$ ) was added to the solution, which was then incubated at 37  $^\circ\text{C}$  for 3 minutes. The absorbance was measured at 652 nm.

To assess the practical applicability of the colorimetric assay, we selected a commercial vitamin C injection for direct detection and commercial orange juice for spiked recovery experiments. The vitamin C injection was diluted to various concentrations for experimental analysis. For the juice samples, the sample is first subjected to centrifugation. Then, filtration was performed using a Macherey-Nagel filter membrane with a pore size of 0.22  $\mu\text{m}$ . Subsequently, the solution undergoes

activated carbon adsorption to remove natural pigment substances. Lastly, the solution was diluted 50 times with acetate buffer solution for the spiked recovery experiments. Each sample was analyzed in triplicate to ensure accuracy. To further validate the reliability of the colorimetric method, high-performance liquid chromatography (HPLC) was employed to determine the corresponding concentrations of ascorbic acid.

[1] X Tan, Q Yang, X Sun, et al. PdIr Aerogels with Boosted Peroxidase-like Activity for a Sensitive Total Antioxidant Capacity Colorimetric Bioassay[J]. ACS Appl. Mater. Interfaces 2022, 14(8): 10047-10054.

[2] S Ali, M De. Thiolated Ligand-Functionalized MoS<sub>2</sub> Nanosheets for Peroxidase-like Activities[J]. ACS Appl. Nano Mater. 2021, 4(11): 12682-12689.

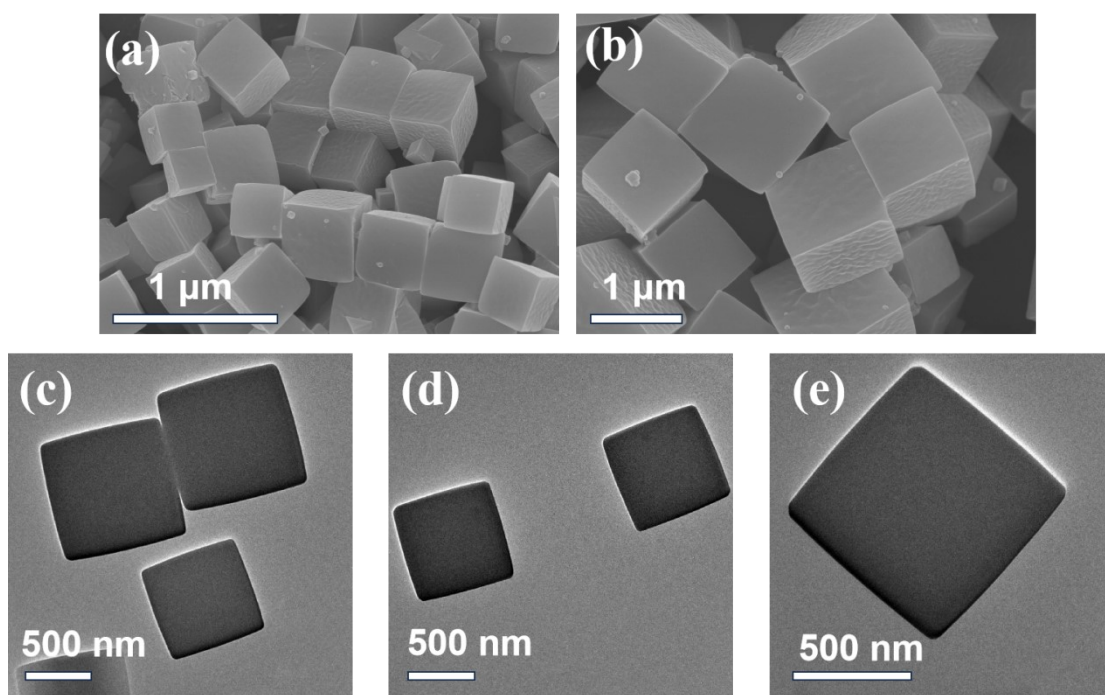

**Figure S1** (a, b) SEM and (c-e) TEM images of ZIF-67 NCs

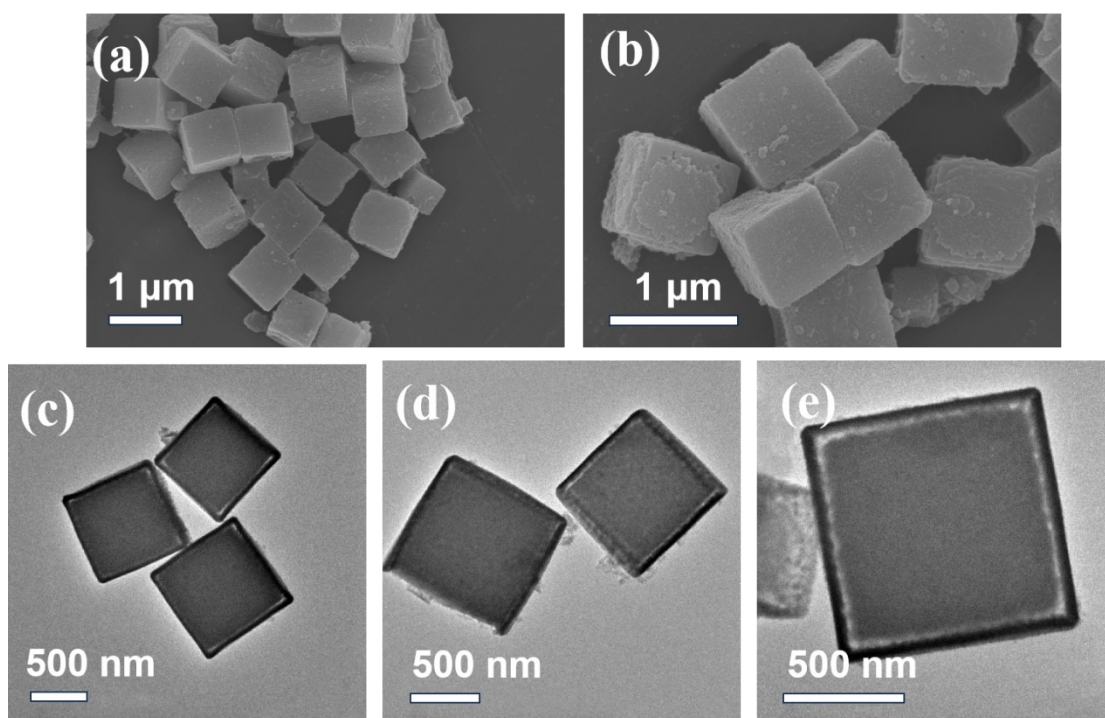

**Figure S2** (a, b) SEM and (c-e) TEM images of ZIF-67@Co-Fe PBA CSNCs

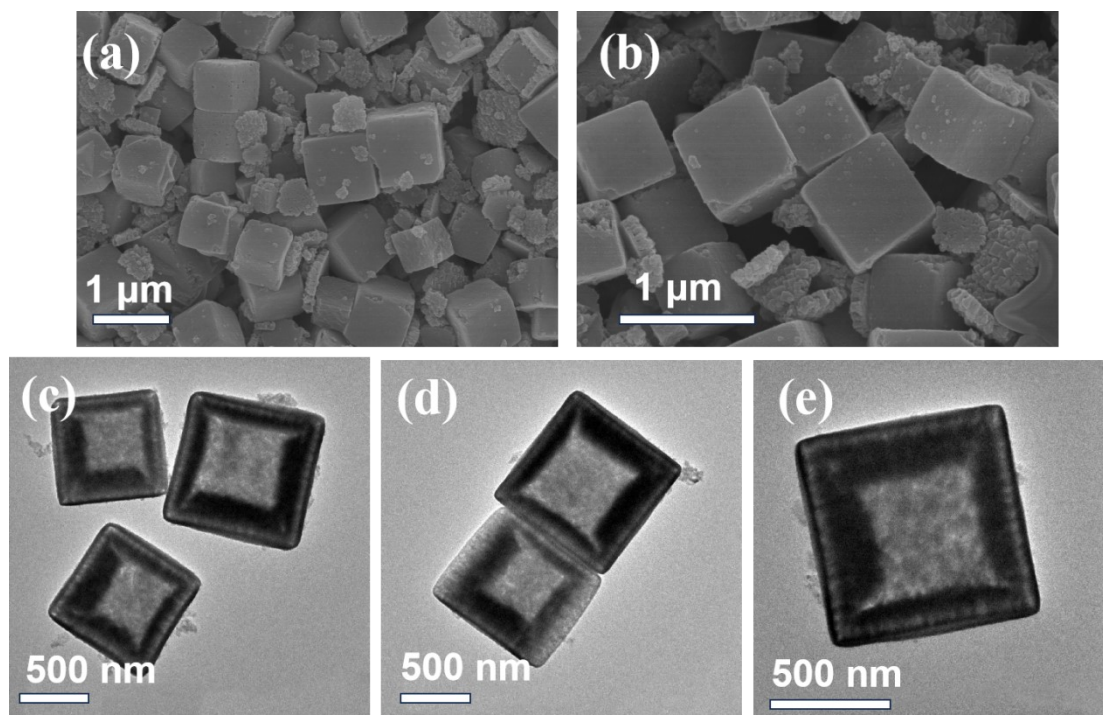

**Figure S3** (a, b) SEM and (c-e) TEM images of Co-Fe PBA SLHNBs

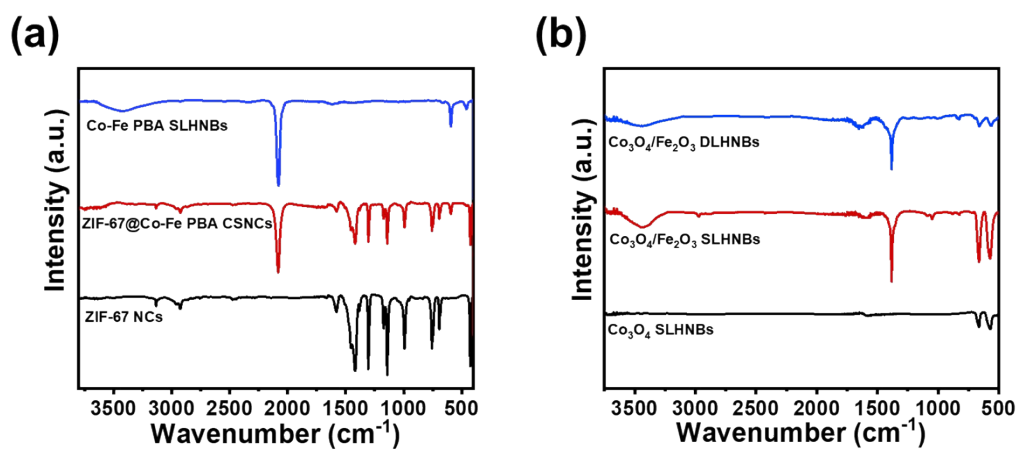

**Figure S4** FTIR spectra (a) ZIF-67 NCs, ZIF-67@Co/Fe PBA CSNCs and Co/Fe PBA SLHNBs. (b)  $\text{Co}_3\text{O}_4$  SLHNBs,  $\text{Co}_3\text{O}_4/\text{Fe}_2\text{O}_3$  SLHNBs and  $\text{Co}_3\text{O}_4/\text{Fe}_2\text{O}_3$  DLHNBs.



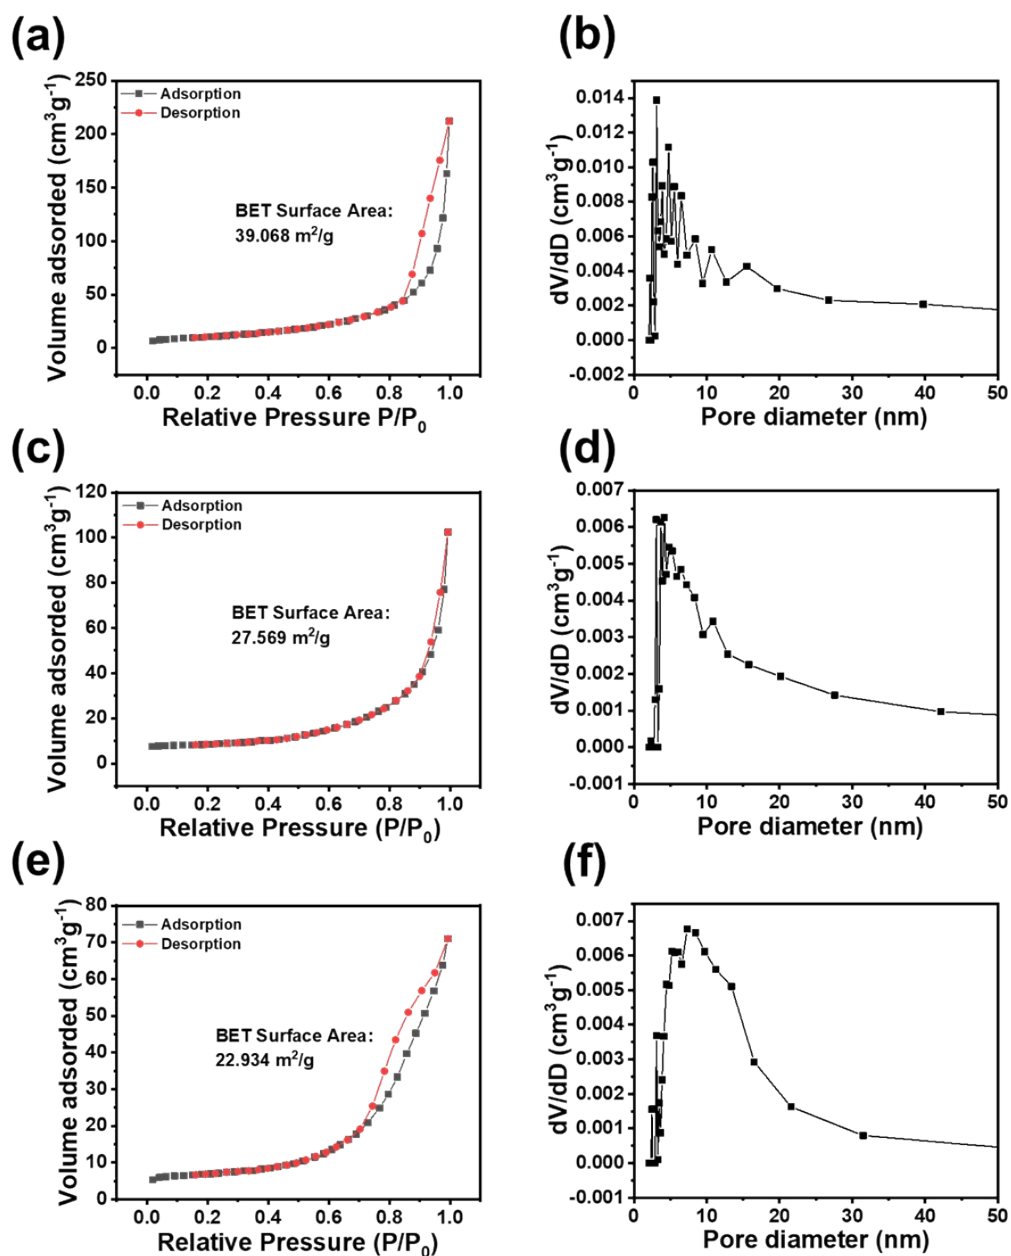

**Figure S5** N<sub>2</sub> adsorption-desorption isotherms and pore-size distribution plot of (a, b)

Co<sub>3</sub>O<sub>4</sub>/Fe<sub>2</sub>O<sub>3</sub> DLHNBs, (c, d) Co<sub>3</sub>O<sub>4</sub>/Fe<sub>2</sub>O<sub>3</sub> SLHNBs, (e, f) Co<sub>3</sub>O<sub>4</sub> SLHNBs.

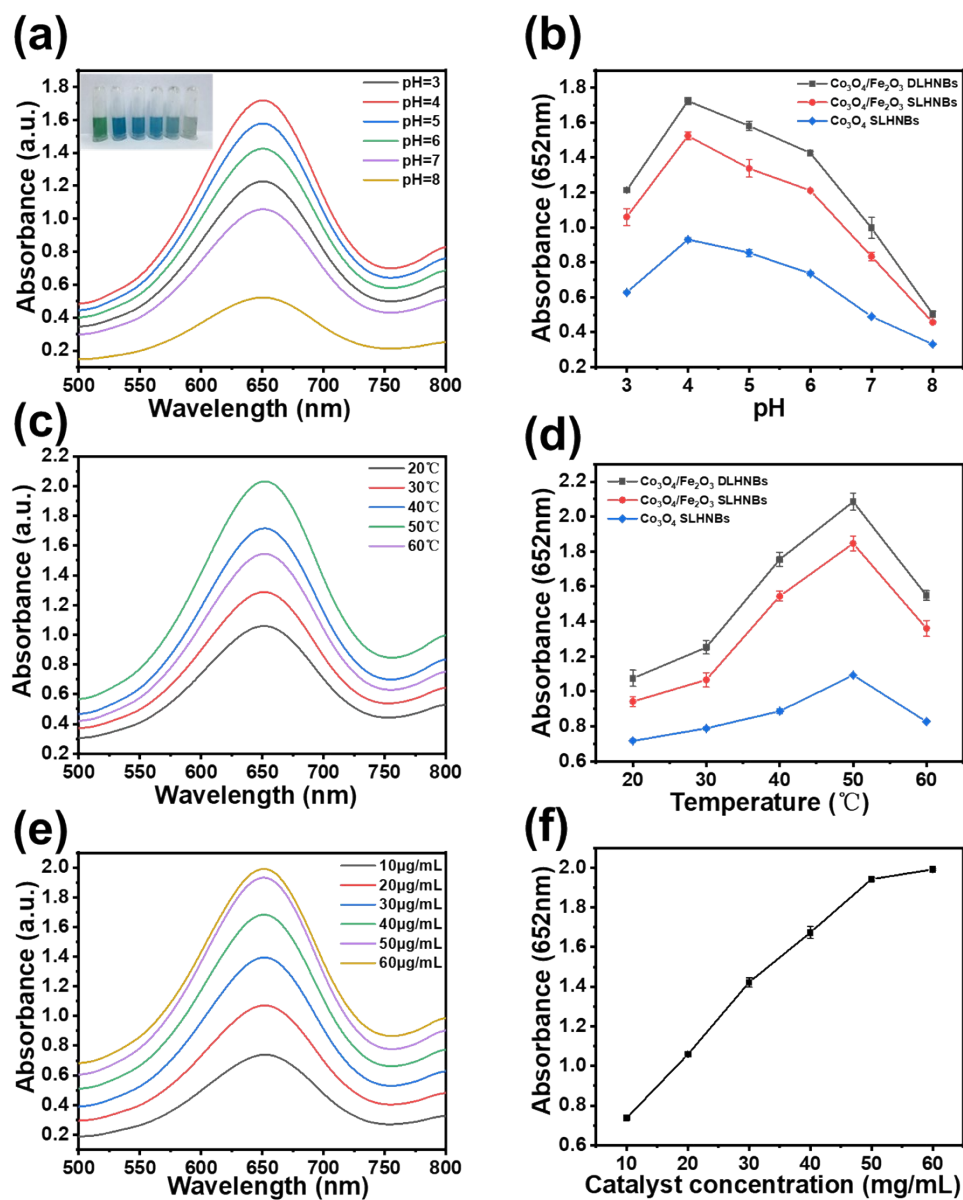

**Figure S6** The effects of (a,b) pH, (c,d) temperature, (e,f) catalyst concentration on the peroxidase-like activities of  $\text{Co}_3\text{O}_4/\text{Fe}_2\text{O}_3$  DLHNBs.

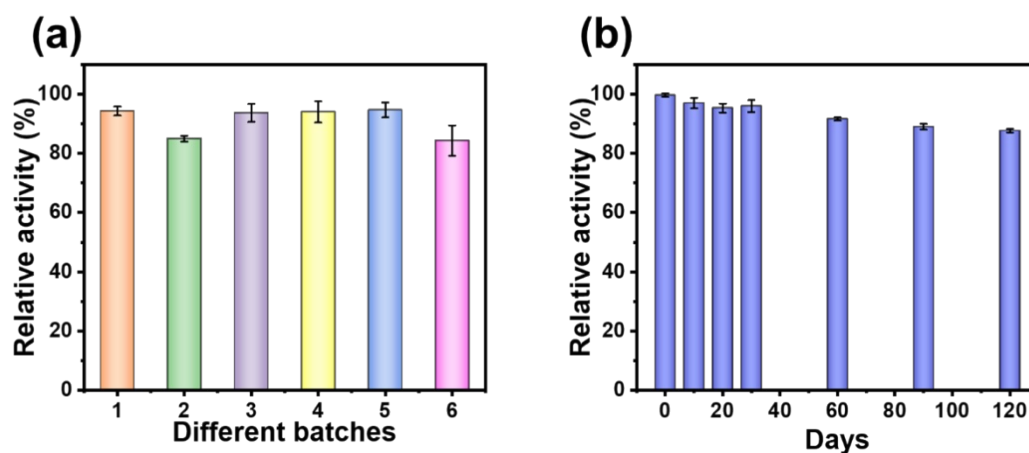

**Figure S7** (a) The catalytic activity of six different batches  $\text{Co}_3\text{O}_4/\text{Fe}_2\text{O}_3$  DLHNBs nanozymes. (b) The storage stability of  $\text{Co}_3\text{O}_4/\text{Fe}_2\text{O}_3$  DLHNBs. The experimental condition for the  $\text{Co}_3\text{O}_4/\text{Fe}_2\text{O}_3$  DLHNBs as a nanozyme are 100  $\mu\text{L}$  of 0.05  $\text{mg mL}^{-1}$   $\text{Co}_3\text{O}_4/\text{Fe}_2\text{O}_3$  DLHNBs, 20  $\mu\text{L}$  of 1  $\text{mM}$   $\text{H}_2\text{O}_2$  and 20  $\mu\text{L}$  of 0.5  $\text{mM}$  TMB mixed with 1.86  $\text{mL}$  of acetate buffer solution (pH 4) at 37  $^{\circ}\text{C}$ . After 3 min, the absorbance of the solution was measured by a UV-vis spectrophotometer at 652 nm.

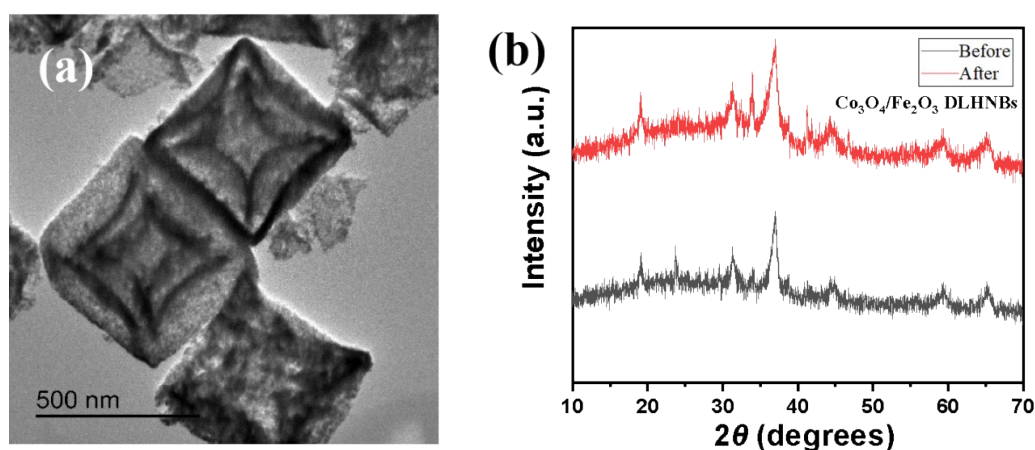

**Figure S8** (a) TEM image and (b) XRD pattern of  $\text{Co}_3\text{O}_4/\text{Fe}_2\text{O}_3$  DLHNBs after catalytic reaction.

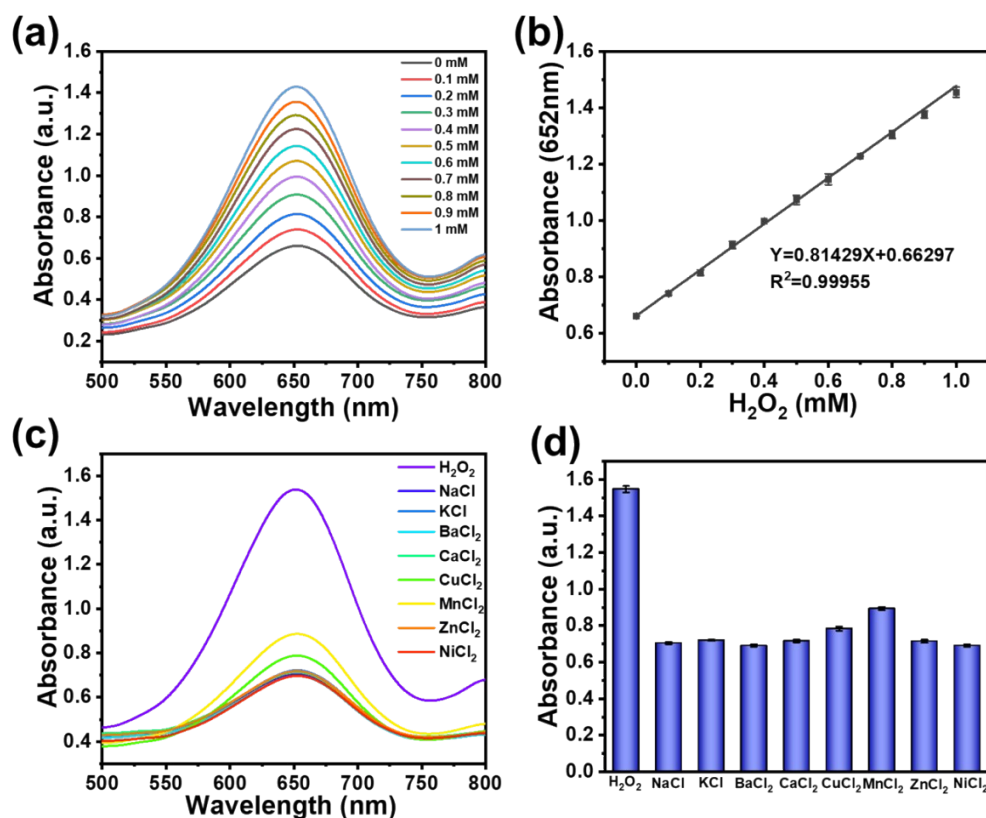

**Figure S9** (a) UV-vis absorption spectra of TMB + Co<sub>3</sub>O<sub>4</sub>/Fe<sub>2</sub>O<sub>3</sub> DLHNBs + H<sub>2</sub>O<sub>2</sub> system with varied concentration of H<sub>2</sub>O<sub>2</sub> and (b) fitted linear curve for H<sub>2</sub>O<sub>2</sub>. (c, d) The absorbance (652 nm) values caused by different species (1 mM H<sub>2</sub>O<sub>2</sub>, 10 mM NaCl, KCl, BaCl<sub>2</sub>, CaCl<sub>2</sub>, CuCl<sub>2</sub>, MnCl<sub>2</sub>, ZnCl<sub>2</sub> and BaCl<sub>2</sub>).

**Table S1.** Comparison of  $K_m$  of different nanozymes.

| Catalyst                                                       | Substrate                     | $K_m$<br>[mM] | $V_{max}$<br>[ $10^{-8} \text{ M s}^{-1}$ ] | Ref.      |
|----------------------------------------------------------------|-------------------------------|---------------|---------------------------------------------|-----------|
| HRP                                                            | TMB                           | 0.43          | 10.00                                       | [1]       |
|                                                                | H <sub>2</sub> O <sub>2</sub> | 3.70          | 8.71                                        |           |
| Co <sub>3</sub> O <sub>4</sub> NPs                             | TMB                           | 0.037         | 6.27                                        | [2]       |
|                                                                | H <sub>2</sub> O <sub>2</sub> | 140.07        | 0.12                                        |           |
| PCN-224-Fe/Co                                                  | TMB                           | 0.26          | 26.35                                       | [3]       |
|                                                                | H <sub>2</sub> O <sub>2</sub> | 8.94          | 35.34                                       |           |
| Fe <sub>3</sub> O <sub>4</sub> MNPs                            | TMB                           | 0.098         | 3.44                                        | [4]       |
|                                                                | H <sub>2</sub> O <sub>2</sub> | 154           | 9.78                                        |           |
| Pal@Co <sub>3</sub> O <sub>4</sub>                             | TMB                           | 0.0218        | 0.45                                        | [5]       |
|                                                                | H <sub>2</sub> O <sub>2</sub> | 30.1          | 0.42                                        |           |
| Co/Fe-MOFs                                                     | TMB                           | 3.51          | 7.63                                        | [6]       |
|                                                                | H <sub>2</sub> O <sub>2</sub> | 5.37          | 2.71                                        |           |
| Co <sub>3</sub> O <sub>4</sub> SLHNBs                          | TMB                           | 0.398         | 13.9                                        | This work |
|                                                                | H <sub>2</sub> O <sub>2</sub> | 1.87          | 8.80                                        |           |
| Co <sub>3</sub> O <sub>4</sub> /Fe <sub>2</sub> O <sub>3</sub> | TMB                           | 0.254         | 21.2                                        | This work |
| SLHNBs                                                         | H <sub>2</sub> O <sub>2</sub> | 1.49          | 13.7                                        |           |
| Co <sub>3</sub> O <sub>4</sub> /Fe <sub>2</sub> O <sub>3</sub> | TMB                           | 0.194         | 24.1                                        | This work |
| DLHNBs                                                         | H <sub>2</sub> O <sub>2</sub> | 0.83          | 13.8                                        |           |

**Table S2.** Comparison of linear range and LOD for H<sub>2</sub>O<sub>2</sub> sensing with other mimetic peroxidase materials.

| Materials                                                      | Linear range (μM) | LOD (μM) | Ref.      |
|----------------------------------------------------------------|-------------------|----------|-----------|
| FePt-Au                                                        | 20-700            | 12.33    | [7]       |
| Co <sub>3</sub> O <sub>4</sub> -MMT                            | 10-100            | 8.7      | [8]       |
| Co <sub>3</sub> O <sub>4</sub>                                 | 50-25000          | 10       | [2]       |
| Cu/Fe <sub>3</sub> O <sub>4</sub> @FeOOH                       | 10-400            | 7.5      | [9]       |
| ZIF-67/rGO                                                     | 7.5-750           | 3.81     | [10]      |
| Fe-N-C SANs                                                    | 10-600            | 4.36     | [11]      |
| Co <sub>3</sub> O <sub>4</sub> /Fe <sub>2</sub> O <sub>3</sub> | 100-1000          | 2.13     | This work |
| DLHNBs                                                         |                   |          |           |

**Table S3.** Detection of AA in Vitamin C injections using a colorimetric method based on Co<sub>3</sub>O<sub>4</sub>/Fe<sub>2</sub>O<sub>3</sub> DLHNBs (*n* = 3).

| Sample | Theoretical value<br>(μg/mL) | Colorimetry                    |              |        | HPLC                          |        |
|--------|------------------------------|--------------------------------|--------------|--------|-------------------------------|--------|
|        |                              | Experiment al value<br>(μg/mL) | Recovery (%) | RSD(%) | Experimental value<br>(μg/mL) | RSD(%) |
| 1      | unspiked sample              | undetected                     | -            | -      | undetected                    | -      |
| 2      | 10.00                        | 10.02±0.29                     | 97.3-103.1   | 2.7    | 10.06 0.21                    | 1.9    |
| 3      | 20.00                        | 20.11±0.46                     | 98.2-102.8   | 2.1    | 20.08 0.24                    | 1.1    |
| 4      | 40.00                        | 40.85±0.83                     | 100.1-104.2  | 1.6    | 40.56 0.62                    | 1.2    |

## References

- [1] L Gao, J Zhuang, L Nie, et al. Intrinsic peroxidase-like activity of ferromagnetic nanoparticles[J]. Nat. Nanotechnol. 2007, 2: 577-583.
- [2] J Mu, Y Wang, M Zhao, et al. Intrinsic peroxidase-like activity and catalase-like activity of Co<sub>3</sub>O<sub>4</sub> nanoparticles[J]. Chem. Commun. 2012, 48(19): 2540-2542.
- [3] X Lai, R Li, B Zhang, et al. Colorimetric strategy of Fe/Co-doped porphyrin metal-organic frameworks with enzyme-like activity for the detection of ascorbic acid[J]. Colloids Surf., A 2023, 680: 132645.
- [4] D Su, S Perathoner, G Centi. Nanocarbons for the development of advanced

catalysts[J]. Chem. Rev. 2013, 113(8): 5782-5816.

[5] P Chen, H Zhong, X Li, et al. Palygorskite@Co<sub>3</sub>O<sub>4</sub> nanocomposites as efficient peroxidase mimics for colorimetric detection of H<sub>2</sub>O<sub>2</sub> and ascorbic acid[J]. Appl. Clay Sci. 2021, 209: 106109.

[6] X Zhao, J Liu, F Xie, et al. Iodide-enhanced Co/Fe-MOFs nanozyme for sensitively colorimetric detection of H<sub>2</sub>S[J]. Spectrochim. Acta, Part A 2021, 262: 120117.

[7] Y Ding, B Yang, H Liu, et al. FePt-Au ternary metallic nanoparticles with the enhanced peroxidase-like activity for ultrafast colorimetric detection of H<sub>2</sub>O<sub>2</sub>[J]. Sens. Actuators, B 2017, 259: 775-783.

[8] X Zhu, W Chen, K Wu, et al. A colorimetric sensor of H<sub>2</sub>O<sub>2</sub> based on Co<sub>3</sub>O<sub>4</sub>-montmorillonite nanocomposites with peroxidase activity[J]. New J. Chem. 2017, 42(2): 1501-1509.

[9] Y Huang, G Liang, T Lin, et al. Magnetic Cu/Fe<sub>3</sub>O<sub>4</sub>@FeOOH with intrinsic HRP-like activity at nearly neutral pH for one-step biosensing[J]. Anal. Bioanal. Chem. 2019, 411: 3801-3810.

[10] D Lu, J Li, Z Wu, et al. High-activity daisy-like zeolitic imidazolate framework-67/reduced graphene oxide-based colorimetric biosensor for sensitive detection of hydrogen peroxide[J]. J. Colloid Interface Sci. 2021, 608: 3069-3078.

[11] W Lu, S Chen, H Zhang, et al. Fe-N-C Single Atom Nanozymes with Dual Enzyme-Mimicking Activities for Colorimetric Detection of Hydrogen Peroxide and Glutathione[J]. J. Materiomics 2022, 8(6): 1251-1259.
